# Supplementary material
Source: HighWire-hosted journal article supplement (https://bmjopen.bmj.com/content/15/4/e090932)
Supplement: inline-supplementary-material-2 [file inline-supplementary-material-2.pdf]

Table S1. Study assessment.

| Period                                                                                                                                                                                        | Enroll<br>ment | BL | Treatment |    |    |    |    | Follow-up |         |
|-----------------------------------------------------------------------------------------------------------------------------------------------------------------------------------------------|----------------|----|-----------|----|----|----|----|-----------|---------|
| Time points (days)                                                                                                                                                                            |                | -1 | 1         | 2  | 3  | 4  | 5  | 19± 2 d   | 33± 2 d |
| Visits                                                                                                                                                                                        | V0             | V0 | V1        | V2 | V3 | V4 | V5 | V6        | V7      |
| Screening for eligibility                                                                                                                                                                     | X              |    |           |    |    |    |    |           |         |
| Written informed consent                                                                                                                                                                      | X              |    |           |    |    |    |    |           |         |
| Inclusion/exclusion criteria                                                                                                                                                                  | X              |    |           |    |    |    |    |           |         |
| Basic information<br>(demographic data,<br>psychiatric history,<br>medical history,<br>antipsychotic records,<br>concomitant treatments)                                                      | X              | X  |           |    |    |    |    |           |         |
| General examination<br>(blood pressure, heart<br>rate, height,<br>weight, weight before<br>medication, BMI, waist<br>circumference,<br>abdominal<br>circumference, change in<br>appetite<br>) | X              | X  |           |    |    |    | X  | X         | X       |
| Clinical symptom<br>assessment (PANSS,<br>CDSS-C, CGI)                                                                                                                                        |                | X  |           |    |    |    |    |           | X       |
| Appetite assessment<br>(TFEQ, FCQ-T, FCQ-S,<br>VAS)                                                                                                                                           |                | X  |           |    |    |    | X  | X         | X       |
| Cognitive assessment<br>DDT, SST                                                                                                                                                              |                | X  |           |    |    |    | X  | X         | X       |
| MCCB                                                                                                                                                                                          |                | X  |           |    |    |    |    |           | X       |
| Laboratory indicator<br>testing                                                                                                                                                               |                |    |           |    |    |    |    |           |         |
| Indicators of glycolipid<br>metabolism (Fasting<br>blood glucose, insulin,                                                                                                                    |                | X  |           |    |    |    | X  |           | X       |

|                         |   |   |   |
|-------------------------|---|---|---|
| glucagon, glycosylated  |   |   |   |
| hemoglobin,             |   |   |   |
| triglycerides, total    |   |   |   |
| cholesterol, total bile |   |   |   |
| acids, HDL, LDL)        |   |   |   |
| Appetite related        | X | X | X |
| Neuroregulatory factors |   |   |   |
| (leptin, cannabinoids,  |   |   |   |
| ghrelin, adiponectin,   |   |   |   |
| GLP-1, Leptin, ,        |   |   |   |
| prolactin,              |   |   |   |
| cholecystokinin, POMC,  |   |   |   |
| AgRP)                   |   |   |   |
| Neurotransmitters       | X | X | X |
| (serotonin, dopamine,   |   |   |   |
| GABA, glutamate, β-     |   |   |   |
| endorphins,             |   |   |   |
| norepinephrine,         |   |   |   |
| epinephrine)            |   |   |   |
| Gut bacteria            | X |   | X |
| Side effects assessment | X | X | X |
| (TESS, AERF)            |   |   |   |
| MRI scans (T1, ASL,     | X | X | X |
| fMRI)                   |   |   |   |

BL: Baseline, BMI: Body Mass Index, PANSS: Positive and Negative Syndrome Scale, CDSS-C: Calgary Depression Scale for Schizophrenia, CGI: Clinical Global Impression, TFEQ: Three Factor Eating Questionnaire, FCQ-T: Food Cravings Questionnaire–Trait, FCQ-S: Food Cravings Questionnaire–State, VAS: Visual Analogue Scale, DDT: Delay Discounting Task, SST: Signal Stop Task, MCCB: MATRICS (Measurement and Treatment Research to Improve Cognition in Schizophrenia) Consensus Cognitive Battery; HDL: High Density Lipoprotein, LDL: Low Density Lipoprotein, GLP-1: glucagon-like peptide-1, POMC: Pro-opiomelanocortin, AgRP: Agouti-related protein, TESS: Treatment Emergent Symptom Scale, AERF: Adverse Event Record Form, MRI: Magnetic Resonance Imaging, ASL: Arterial Spin Labeling, fMRI: functional Magnetic Resonance Imaging.
